# Supplementary material for: Primary Mechanical Modification to Improve Performance of Miscanthus as Stand-Alone Growing Substrates
Source: MDPI journal article supplement (doi:10.3390/agronomy12020420), 2022-02-08
Supplement: s1 [file s1]

## Supplementary

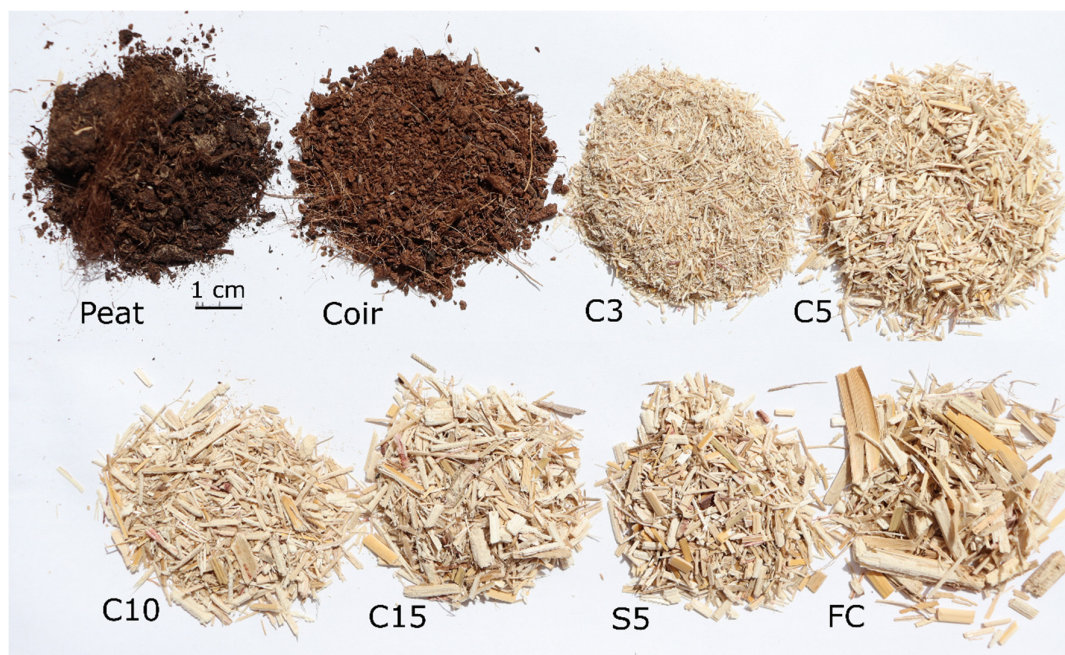

Figure S1. Visual appearance of peat, coir and six processed miscanthus substrates (bar = 1 cm). *Miscanthus x giganteus* was harvested with forage harvester (FC, field-chips), then processed with a mechanical fraying facility through a 5-mm screen (S5, shreds) or a hammermill with screen sizes of 15, 10, 5 and 3 mm (C15, C10, C5 and C3, chips).

Table S1. Substrate porosity: wet mass and bulk density of substrates at packing, porosity mean of substrates.

| Substrate | Wet mass<br>at packing<br>(g g <sup>-1</sup> ) | Bulk density<br>at packing<br>(g cm <sup>-3</sup> ) | Total<br>porosity<br>(%) | Water holding<br>capacity<br>(%) | Air-filled<br>porosity<br>(%) |
|-----------|------------------------------------------------|-----------------------------------------------------|--------------------------|----------------------------------|-------------------------------|
| Peat      | 1.85 ± 0.16                                    | 0.263 ± 0.015                                       | 78.1 ± 1.8 e             | 67.7 ± 6.3 ab                    | 10.4 ± 4.9 f                  |
| Coir      | 5.34 ± 0.15                                    | 0.086 ± 0.001                                       | 88.0 ± 3.6 d             | 70.2 ± 2.8 a                     | 17.8 ± 6.3 e                  |
| C3        | 3.72 ± 0.06                                    | 0.106 ± 0.006                                       | 91.8 ± 1.3 bc            | 62.5 ± 4.1 b                     | 29.2 ± 5.0 d                  |
| C5        | 3.84 ± 0.18                                    | 0.099 ± 0.006                                       | 95.6 ± 0.8 a             | 54.0 ± 5.3 c                     | 41.6 ± 5.7 c                  |
| C10       | 3.60 ± 0.22                                    | 0.096 ± 0.002                                       | 95.2 ± 2.4 a             | 45.6 ± 2.4 d                     | 49.7 ± 3.9 b                  |
| C15       | 3.65 ± 0.11                                    | 0.095 ± 0.002                                       | 95.8 ± 1.0 a             | 45.4 ± 2.1 d                     | 50.4 ± 2.1 ab                 |
| S5        | 3.11 ± 0.11                                    | 0.104 ± 0.003                                       | 94.5 ± 1.6 ab            | 43.7 ± 2.0 d                     | 50.8 ± 2.3 ab                 |
| FC        | 2.64 ± 0.10                                    | 0.097 ± 0.002                                       | 91.3 ± 1.9 c             | 34.3 ± 2.8 e                     | 57.0 ± 2.7 a                  |

Different lower case letters indicate statistically significant differences in means among tested substrates at each column (Tukey's HSD,  $p \leq 0.05$ , mean ± standard deviation,  $n = 8$ ). *Miscanthus x giganteus* was harvested with forage harvester (FC, field-chips), then processed with a mechanical fraying facility through a 5-mm screen (S5, shreds) or a hammermill with screen sizes of 15, 10, 5 and 3 mm (C15, C10, C5 and C3, chips).

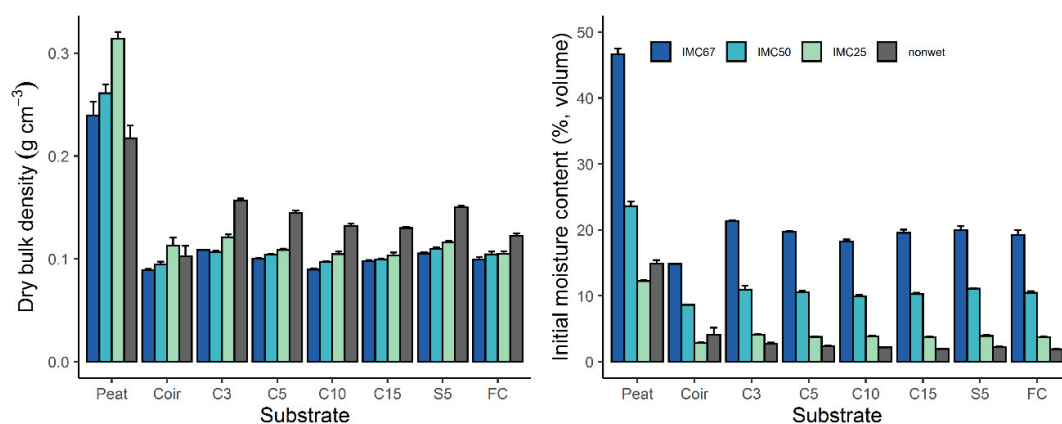

Figure S2. Substrate wettability: packing bulk density, initial moisture content of peat, coir and processed miscanthus substrates. *Miscanthus x giganteus* was harvested with forage harvester (FC, field-chips), then processed with a mechanical fraying facility through a 5-mm screen (S5, shreds) or a hammermill with screen sizes of 15, 10, 5 and 3 mm (C15, C10, C5 and C3, chips).

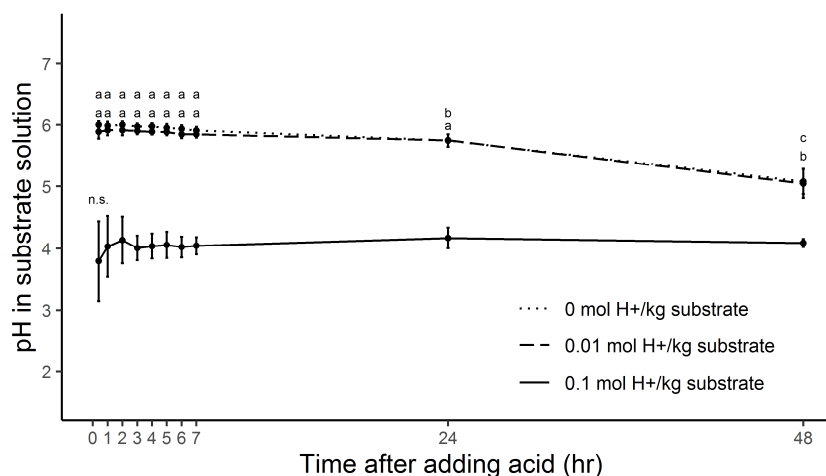

Figure S3. Substrate pH buffering capacity: time to pH stabilization. The curves represent for mean values of S5 and C3. Different lower case letters indicate statistically significant differences in means among time points at each proton concentration (Tukey's HSD,  $p \leq 0.05$ , mean  $\pm$  standard deviation,  $n = 10$ ). The time at 24 hours after acid addition was selected as time when pH stabilization. At 48 hours after acid addition, fungal mycelium on surface of substrate suspension was observed.

Table S2. Nutrient concentration of input nutrient solution for seedling growth.

| Nutrient                       | Concentration |
|--------------------------------|---------------|
| NH <sub>4</sub>                | 1.20          |
| K                              | 9.50          |
| Ca                             | 5.40          |
| Mg                             | 2.40          |
| NO <sub>3</sub>                | 16.0          |
| H <sub>2</sub> PO <sub>4</sub> | 1.50          |
| SO <sub>4</sub>                | 4.40          |
| Fe                             | 15.0          |
| Mn                             | 10.0          |
| Zn                             | 5.0           |
| B                              | 30.0          |
| Cu                             | 0.75          |

|                          |      |
|--------------------------|------|
| Mo                       | 0.50 |
| EC (dS m <sup>-1</sup> ) | 2.63 |
| pH                       | 5.5  |

Table S3. pH, EC and water-soluble nutrients from extract solution of sowing cells without plants.

| Substrate                                 | day 4           | day 8           | day 12          | day 16         | day 20         | day 24          |
|-------------------------------------------|-----------------|-----------------|-----------------|----------------|----------------|-----------------|
| <i>pH</i>                                 |                 |                 |                 |                |                |                 |
| Peat                                      | 5.5 ± 0.0 b     | 5.7 ± 0.0 c     | 5.9 ± 0.1 e     | 5.8 ± 0.2 c    | 6.1 ± 0.1 d    | 6.3 ± 0.2 d     |
| Coir                                      | 5.5 ± 0.1 b     | 5.6 ± 0.0 c     | 5.8 ± 0.1 e     | 5.8 ± 0.1 c    | 6 ± 0.1 d      | 6.5 ± 0.2 d     |
| C3                                        | 8.0 ± 0.2 a     | 8.5 ± 0.1 a     | 7.7 ± 0.1 a     | 8.6 ± 0.1 a    | 8.6 ± 0.1 a    | 8.4 ± 0.1 a     |
| C5                                        | 8.1 ± 0.1 a     | 8.5 ± 0.0 a     | 7.6 ± 0.1 ab    | 8.7 ± 0.1 a    | 8.6 ± 0.1 a    | 8.0 ± 0.2 ab    |
| C10                                       | 8.1 ± 0.1 a     | 8.5 ± 0.1 a     | 7.6 ± 0.1 bc    | 8.6 ± 0.2 a    | 8.4 ± 0.2 ab   | 7.7 ± 0.1 bc    |
| C15                                       | 8.3 ± 0.1 a     | 8.5 ± 0.1 a     | 7.5 ± 0.0 bc    | 8.6 ± 0.1 a    | 8.3 ± 0.1 bc   | 7.6 ± 0.2 c     |
| S5                                        | 8.3 ± 0.1 a     | 8.2 ± 0.1 b     | 7.4 ± 0.0 cd    | 8.5 ± 0.1 ab   | 8.4 ± 0.1 ab   | 7.5 ± 0.2 c     |
| FC                                        | 8.2 ± 0.2 a     | 8.3 ± 0.1 ab    | 7.3 ± 0.0 d     | 8.2 ± 0.1 b    | 8.0 ± 0.2 c    | 7.6 ± 0.3 c     |
| <i>EC (dS m<sup>-1</sup>)</i>             |                 |                 |                 |                |                |                 |
| Peat                                      | 1.3 ± 0.1 cd    | 1.8 ± 0.2 a     | 2.3 ± 0.4 bc    | 2.1 ± 0.1 ab   | 2.3 ± 0.1 bc   | 2.3 ± 0.1 bc    |
| Coir                                      | 1.3 ± 0.1 d     | 1.7 ± 0.1 a     | 2.3 ± 0.2 bc    | 2.0 ± 0.1 b    | 2.4 ± 0.1 bc   | 2.0 ± 0.0 c     |
| C3                                        | 2.0 ± 0.1 a     | 1.9 ± 0.2 a     | 2.7 ± 0.1 a     | 2.4 ± 0.1 a    | 3.0 ± 0.2 a    | 2.9 ± 0.3 a     |
| C5                                        | 1.8 ± 0.2 ab    | 1.8 ± 0.1 a     | 2.6 ± 0.3 ab    | 2.5 ± 0.3 a    | 3.0 ± 0.2 a    | 2.5 ± 0.3 ab    |
| C10                                       | 1.9 ± 0.2 ab    | 1.9 ± 0.2 a     | 2.5 ± 0.2 ab    | 2.3 ± 0.1 ab   | 2.6 ± 0.3 bc   | 2.5 ± 0.1 ab    |
| C15                                       | 1.7 ± 0.1 ab    | 1.6 ± 0.1 a     | 2.0 ± 0.2 bc    | 1.9 ± 0.1 b    | 2.2 ± 0.2 c    | 2.0 ± 0.3 bc    |
| S5                                        | 1.7 ± 0 bc      | 1.8 ± 0.1 a     | 2.0 ± 0.1 bc    | 2.0 ± 0.3 b    | 2.7 ± 0.2 ab   | 2.1 ± 0.2 bc    |
| FC                                        | 1.7 ± 0.2 ab    | 1.9 ± 0.1 a     | 1.9 ± 0.1 c     | 1.9 ± 0.1 b    | 2.3 ± 0.3 bc   | 1.9 ± 0.1 c     |
| <i>NO<sub>3</sub> (mg L<sup>-1</sup>)</i> |                 |                 |                 |                |                |                 |
| Peat                                      | 478 ± 62.2 a    | 954.0 ± 138.5 a | 506.3 ± 100.1 a | 334.3 ± 40.0 a | 804.0 ± 48.1 a | 1040.8 ± 62.5 a |
| Coir                                      | 405.8 ± 55.3 a  | 862.0 ± 67.1 a  | 537.8 ± 116.7 a | 312.3 ± 17.5 a | 772.3 ± 33.1 a | 787.3 ± 60.1 b  |
| C3                                        | 149.8 ± 17.9 bc | 144.0 ± 25.8 b  | 44.8 ± 4.3 b    | 31.3 ± 3.3 b   | 84.8 ± 10.5 b  | 106.8 ± 10.8 c  |
| C5                                        | 160.8 ± 15.8 b  | 131.3 ± 17.0 b  | 48.3 ± 10.8 b   | 34.8 ± 3.0 b   | 84.5 ± 6.6 b   | 103.0 ± 8.7 c   |
| C10                                       | 148.0 ± 15.0 bc | 138.8 ± 11.9 b  | 33.5 ± 2.5 b    | 33.8 ± 2.2 b   | 76.0 ± 5.7 b   | 111.8 ± 6.8 c   |
| C15                                       | 156.0 ± 7.4 b   | 140.0 ± 24.8 b  | 28.5 ± 2.1 b    | 29.0 ± 1.8 b   | 66.0 ± 3.5 b   | 94.5 ± 4.4 c    |
| S5                                        | 140.5 ± 23.6 bc | 113.3 ± 20.4 b  | 26.8 ± 1.7 b    | 26.5 ± 3.7 b   | 70.0 ± 3.2 b   | 86.8 ± 8.2 c    |
| FC                                        | 78.5 ± 16.8 c   | 126.0 ± 18.1 b  | 21.8 ± 1.7 b    | 34.0 ± 2.2 b   | 77.0 ± 4.5 b   | 76.8 ± 3.9 c    |
| <i>NH<sub>4</sub> (mg L<sup>-1</sup>)</i> |                 |                 |                 |                |                |                 |
| Peat                                      | 5.8 ± 0.5 b     | 8.5 ± 1.9 c     | 11.0 ± 1.3 d    | 14.5 ± 1.3 c   | 12.5 ± 1.0 d   | 14.3 ± 1.0 c    |
| Coir                                      | 9.0 ± 0.8 b     | 12.0 ± 0.8 c    | 17.5 ± 1.8 c    | 21.3 ± 1.0 c   | 20.3 ± 1.3 c   | 18.0 ± 0.0 c    |
| C3                                        | 33.0 ± 3.2 a    | 29.3 ± 2.2 ab   | 37.8 ± 1.3 a    | 49.3 ± 2.2 ab  | 42.8 ± 3.7 a   | 38.5 ± 2.6 a    |
| C5                                        | 30.5 ± 2.4 a    | 28.0 ± 2.2 b    | 35.5 ± 2.6 ab   | 52.3 ± 3.6 ab  | 43.3 ± 2.2 a   | 34.5 ± 3.7 ab   |
| C10                                       | 33.0 ± 2.2 a    | 29.3 ± 3.9 ab   | 36.5 ± 2.4 ab   | 52.0 ± 2.2 ab  | 41.0 ± 1.8 ab  | 37.3 ± 1.5 ab   |

|                          |                |                 |                |                |                 |                |
|--------------------------|----------------|-----------------|----------------|----------------|-----------------|----------------|
| C15                      | 30.5 ± 2.1 a   | 27.0 ± 2.2 b    | 32.8 ± 3.3 b   | 46.5 ± 3.4 b   | 36.0 ± 2.4 b    | 33.3 ± 2.5 b   |
| S5                       | 30.5 ± 0.6 a   | 30.3 ± 2.6 ab   | 32.5 ± 1.2 b   | 48.3 ± 5.4 ab  | 42.8 ± 2.2 a    | 33.5 ± 1.7 b   |
| FC                       | 33.3 ± 2.5 a   | 33.8 ± 1.0 a    | 34.0 ± 2.1 ab  | 54.5 ± 1.3 a   | 40.5 ± 3.5 ab   | 33.0 ± 1.8 b   |
| K (mg L <sup>-1</sup> )  |                |                 |                |                |                 |                |
| Peat                     | 53.3 ± 9.0 b   | 100.8 ± 16.9 d  | 146.8 ± 22.8 c | 154.5 ± 12.7 c | 168.8 ± 14.5 d  | 295.0 ± 16.9 c |
| Coir                     | 104.0 ± 10.8 b | 173.8 ± 14.0 c  | 277.0 ± 30.6 b | 241.5 ± 6.7 b  | 331.5 ± 25.8 c  | 424.3 ± 8.2 b  |
| C3                       | 394.8 ± 33.3 a | 405.0 ± 27.7 ab | 589.5 ± 56.5 a | 501.3 ± 10.1 a | 629.8 ± 44.9 ab | 668.0 ± 29.7 a |
| C5                       | 361.0 ± 33.2 a | 390.3 ± 13.1 b  | 585.5 ± 36.2 a | 515.5 ± 19.7 a | 666.5 ± 35.6 ab | 661.5 ± 54.6 a |
| C10                      | 382.0 ± 19.4 a | 419.8 ± 51.4 ab | 616.5 ± 48.2 a | 518.3 ± 20.6 a | 677.3 ± 21.4 ab | 757.8 ± 33.1 a |
| C15                      | 349.8 ± 21.2 a | 389.3 ± 7.0 b   | 568.3 ± 52.4 a | 490.5 ± 30.3 a | 609.5 ± 56.9 b  | 717.5 ± 37.2 a |
| S5                       | 352.8 ± 13.8 a | 416.0 ± 25.4 ab | 559.0 ± 21.0 a | 489.3 ± 44.8 a | 676.8 ± 6.2 ab  | 737.0 ± 75.9 a |
| FC                       | 398.0 ± 35.8 a | 455.0 ± 13.4 a  | 606.5 ± 41.9 a | 522.8 ± 9.7 a  | 723.0 ± 73.4 a  | 716.0 ± 43.9 a |
| Ca (mg L <sup>-1</sup> ) |                |                 |                |                |                 |                |
| Peat                     | 214.0 ± 31.6 a | 214.0 ± 31.6 a  | 327.5 ± 68.6 a | 303.0 ± 22.2 a | 383.0 ± 33.7 a  | 135.0 ± 10.0 a |
| Coir                     | 156.5 ± 9.6 b  | 156.5 ± 9.6 b   | 277.5 ± 48.0 a | 205.5 ± 8.2 b  | 263.0 ± 33.7 b  | 75.3 ± 2.6 b   |
| C3                       | 36.8 ± 10.3 c  | 36.8 ± 10.3 c   | 46.8 ± 20.2 b  | 59.5 ± 7.5 c   | 60.0 ± 15.4 c   | 27.0 ± 2.2 c   |
| C5                       | 32.0 ± 3.3 c   | 32.0 ± 3.3 c    | 41.5 ± 8.0 b   | 47.8 ± 3.0 cd  | 49.5 ± 4.0 c    | 26.8 ± 4.0 c   |
| C10                      | 31.5 ± 3.7 c   | 31.5 ± 3.7 c    | 28.8 ± 11.1 b  | 39.0 ± 3.9 de  | 36.5 ± 9.5 c    | 18.8 ± 3.4 cd  |
| C15                      | 26.0 ± 3.2 c   | 26.0 ± 3.2 c    | 28.3 ± 8.1 b   | 35.0 ± 8.7 de  | 39.0 ± 7.9 c    | 17.8 ± 1.5 cd  |
| S5                       | 29.3 ± 6.2 c   | 29.3 ± 6.2 c    | 29.3 ± 4.3 b   | 33.8 ± 4.3 de  | 34.3 ± 3.4 c    | 17.0 ± 4.2 cd  |
| FC                       | 26.0 ± 11.3 c  | 26 ± 11.3 c     | 14.3 ± 6.7 b   | 19.3 ± 3.4 e   | 20.5 ± 5.8 c    | 13.8 ± 3.8 d   |
| P (mg L <sup>-1</sup> )  |                |                 |                |                |                 |                |
| Peat                     | 9.6 ± 0.8 b    | na              | na             | 11.4 ± 0.8 c   | na              | 11.1 ± 0.6 b   |
| Coir                     | 13.2 ± 0.6 b   |                 |                | 16.4 ± 0.7 c   |                 | 15.8 ± 0.5 b   |
| C3                       | 64.2 ± 12.3 a  |                 |                | 48.6 ± 4.0 b   |                 | 41.3 ± 6.6 a   |
| C5                       | 49.4 ± 3.7 a   |                 |                | 57.8 ± 1.8 ab  |                 | 43.9 ± 5.1 a   |
| C10                      | 56.1 ± 7.9 a   |                 |                | 58.6 ± 8.8 ab  |                 | 56.9 ± 7.6 a   |
| C15                      | 44.9 ± 5.3 a   |                 |                | 52.8 ± 11.8 ab |                 | 50.7 ± 5.1 a   |
| S5                       | 45.8 ± 9.0 a   |                 |                | 57.8 ± 12.1 ab |                 | 61.1 ± 13.0 a  |
| FC                       | 53.1 ± 7.2 a   |                 |                | 71.5 ± 6.0 a   |                 | 51.4 ± 14.3 a  |

Different lower case letters indicate statistically significant differences in means among tested substrates at each parameter for each day (Tukey's HSD,  $p \leq 0.05$ , mean ± standard deviation,  $n = 4$ ). *Miscanthus x giganteus* was harvested with forage harvester (FC, field-chips), then processed with a mechanical fraying facility through a 5-mm screen (S5, shreds) or a hammer mills with screen sizes of 15, 10, 5 and 3 mm (C15, C10, C5 and C3, chips).

Table S4. pH, EC and water-soluble nutrients from extract solution of cells with plants.

| Substrate | pH          | EC (dS/m)   | NO <sub>3</sub> (mg/L) | NH <sub>4</sub> (mg/L) | K (mg/L)      | Ca (mg/L)      | P (mg/L)    |
|-----------|-------------|-------------|------------------------|------------------------|---------------|----------------|-------------|
| Day 9     |             |             |                        |                        |               |                |             |
| Peat      | 6.0 ± 0.1 b | 1.6 ± 0.2 c | 310.8 ± 48.2 a         | 8.5 ± 1.7 b            | 97.0 ± 15.7 b | 197.5 ± 29.9 a | 7.7 ± 2.3 c |

|        |              |              |                |              |                 |                |               |
|--------|--------------|--------------|----------------|--------------|-----------------|----------------|---------------|
| Coir   | 5.9 ± 0.0 b  | 1.7 ± 0.3 bc | 303.8 ± 82.5 a | 13.5 ± 1.9 b | 205.5 ± 38.4 b  | 152.5 ± 26.3 b | 18.5 ± 4.2 bc |
| C3     | 8.1 ± 0.2 a  | 2.3 ± 0.5 bc | 36.3 ± 5.9 b   | 35.5 ± 5.7 a | 613.3 ± 114.8 a | 37.8 ± 18.0 c  | 59.5 ± 22.7 a |
| C5     | 8.1 ± 0.2 a  | 2.5 ± 0.5 a  | 38.3 ± 11.6 b  | 38.8 ± 4.4 a | 666.0 ± 46.9 a  | 30.3 ± 9.6 c   | 66.4 ± 13.0 a |
| C10    | 8.0 ± 0.0 a  | 2.4 ± 0.2 ab | 28.5 ± 4.1 b   | 39.0 ± 1.6 a | 683.8 ± 57.3 a  | 20.8 ± 10.8 c  | 67.6 ± 22.4 a |
| C15    | 8.0 ± 0.1 a  | 2.2 ± 0.2 bc | 24.8 ± 3.6 b   | 36.0 ± 3.2 a | 646.5 ± 35.1 a  | 17.3 ± 5.6 c   | 57.0 ± 3.8 a  |
| S5     | 8.0 ± 0.1 a  | 1.9 ± 0.1 bc | 18.3 ± 2.9 b   | 32.0 ± 2.4 a | 587.8 ± 59.3 a  | 23.8 ± 11.5 c  | 50.7 ± 6.9 ab |
| FC     | 7.9 ± 0.1 a  | 2.0 ± 0.2 bc | 19.5 ± 2.9 b   | 35.3 ± 2.1 a | 640.3 ± 55.6 a  | 2.5 ± 7.4 c    | 59.4 ± 4.8 a  |
| Day 17 |              |              |                |              |                 |                |               |
| Peat   | 6.2 ± 0.0 e  | 2.1 ± 0.2 cd | 425.8 ± 94.4 a | 10.3 ± 1.0 b | 120.3 ± 16.2 c  | 327.5 ± 34.2 a | 9.0 ± 0.4 b   |
| Coir   | 6.3 ± 0.1 e  | 1.8 ± 0.1 d  | 325.0 ± 19.5 b | 15.3 ± 1.0 b | 216.0 ± 10.4 b  | 190.0 ± 12.6 b | 15.8 ± 1.7 b  |
| C3     | 8.4 ± 0.1 a  | 3.0 ± 0.2 a  | 107.5 ± 11.0 c | 37.0 ± 2.4 a | 526.5 ± 24.3 a  | 51.3 ± 10.0 c  | 57.4 ± 9.5 a  |
| C5     | 8.2 ± 0.0 ab | 2.8 ± 0.1 ab | 95.0 ± 7.8 c   | 36.3 ± 1.0 a | 538.5 ± 7.1 a   | 54.5 ± 9.2 c   | 63.4 ± 5.2 a  |
| C10    | 8.0 ± 0.2 bc | 2.5 ± 0.6 bc | 82.8 ± 13.7 c  | 35.0 ± 5.8 a | 532.0 ± 79.3 a  | 38.3 ± 13.1 c  | 76.1 ± 20.5 a |
| C15    | 8.0 ± 0.1 c  | 2.4 ± 0.2 cd | 79.5 ± 5.0 c   | 33.5 ± 1.3 a | 521.8 ± 25.6 a  | 40.3 ± 7.1 c   | 52.5 ± 4.7 a  |
| S5     | 7.9 ± 0.0 c  | 2.6 ± 0.3 bc | 80.0 ± 7.0 c   | 36.0 ± 2.9 a | 561.3 ± 45.2 a  | 40.0 ± 9.3 c   | 80.7 ± 21.6 a |
| FC     | 7.7 ± 0.0 d  | 2.1 ± 0.1 cd | 77.5 ± 10.9 c  | 33.5 ± 1.3 a | 542.8 ± 29.3 a  | 28.3 ± 8.1 c   | 67.9 ± 5.6 a  |

Different lower case letters indicate statistically significant differences in means among tested substrates at each parameter for each day (Tukey's HSD,  $p \leq 0.05$ , mean  $\pm$  standard deviation,  $n = 4$ ). *Miscanthus x giganteus* was harvested with forage harvester (FC, field-chips), then processed with a mechanical fraying facility through a 5-mm screen (S5, shreds) or a hammer mills with screen sizes of 15, 10, 5 and 3 mm (C15, C10, C5 and C3, chips).

Table S5. Cation exchange capacity (CEC) of miscanthus substrates *M. x giganteus* ( $n = 2$ ) using ammonium acetate.

| Substrate | Cation exchange capacity (cmolc kg <sup>-1</sup> ) |      |      |      |
|-----------|----------------------------------------------------|------|------|------|
|           | K                                                  | Na   | Ca   | Mg   |
| C15       | 13.03                                              | 0.12 | 2.21 | 3.19 |
| S5        | 12.37                                              | 0.16 | 1.66 | 2.17 |

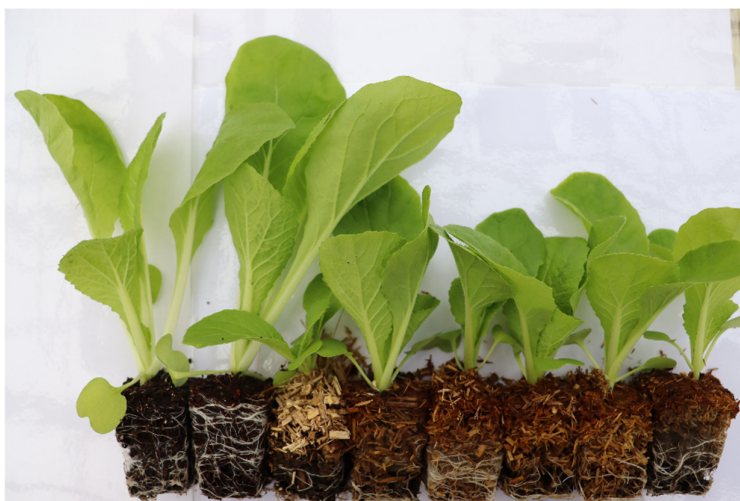

Figure S4. Seedlings at harvest day, from left to right: peat, coir, FC, S5, C15, C10, C3.

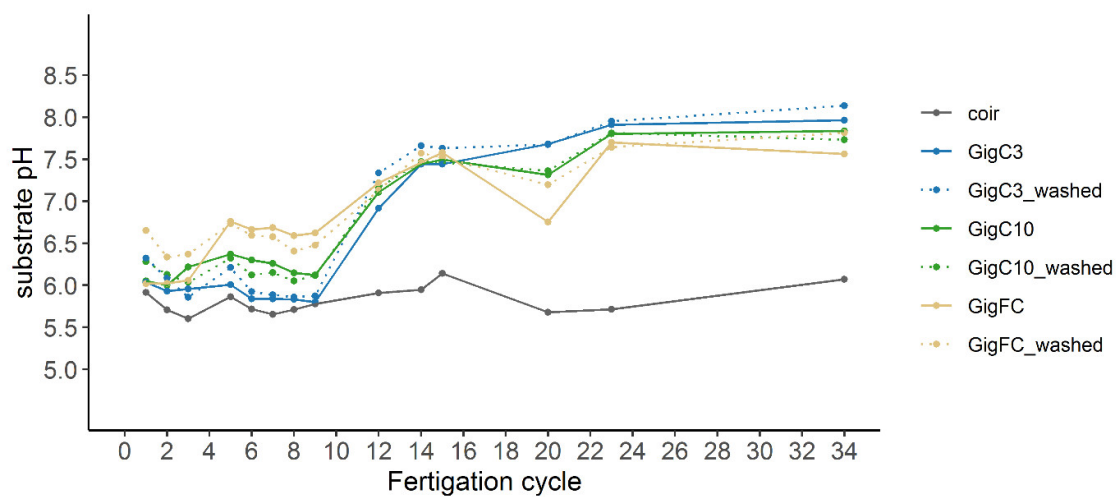

Figure S5. pH evolution of washed and non-washed substrates.
